# Supplementary material for: Single Nucleotide Polymorphisms in Genes Encoding Toll-Like Receptors 7 and 8 and Their Association with Proviral Load of SRLVs in Goats of Polish Carpathian Breed
Source: Animals (Basel). 2021 Jun 26;11(7):1908. doi: 10.3390/ani11071908 (PMC8300119; doi:10.3390/ani11071908)
Supplement: Supplementary file 1 [file animals-11-01908-s001.zip]

Archive with 4 entries (4 files):
- Supplementary Figure S1. The exact TLR7 SNPs localization based on transcript and genomic sequence..pdf
- Supplementary Figure S2. The exact TLR8 SNPs localization based on transcript and genomic sequence..pdf
- Supplementary Figure S3.pdf
- Supplementary Table S1-updated.pdf
