# Supplementary material for: Single Nucleotide Polymorphisms in Genes Encoding Toll-Like Receptors 7 and 8 and Their Association with Proviral Load of SRLVs in Goats of Polish Carpathian Breed
Source: Animals (Basel). 2021 Jun 26;11(7):1908. doi: 10.3390/ani11071908 (PMC8300119; doi:10.3390/ani11071908)
Supplement: Supplementary file 1 [file animals-11-01908-s001.zip › Supplementary Figure S1. The exact TLR7 SNPs localization based on transcript and genomic sequence..pdf]

**Gene: TLR7 ENSCHIG00000021012**

**Transcript: TLR7-201 ENSCHIT00000031299.1**

**Genome assembly: ARS1 (GCA\_001704415.1) Ensembl**

cDNA sequence with SNP localization:

```
1 TCTTTGCACTTGGAAGTTTCACGACTGGCAGCCTGCAGTCTCCATGACTTAAGTAGGTTT 60
.....
.....
LWLT01000021.1_50718645_c/T 5'UTR variant

61 GCCACAGCTCATCTCTTCACCTCAGAAGACTCCAGACCTGGACTCACTCCATGCAGCAAA 120
.....
.....

121 GAAAGTTGATGCTACTGGGTCCATCTCAGGCTGATCTTGACACCTTCCATGTTCTGCTCT 180
.....
.....

181 CTTCAGCCAGACTTGTCTGTTTCATTTTGAAGAAGACTAAAAATGGTGTTTCCAATGTG 240
.....ATGGTGTTTCCAATGTG 17
.....-M--V--F--P--M--W 6

241 GACACTGAAGAGACAGTTTCCTATCCTTTTAAACATGATCCTAATTCTGAACTCCTTGG 300
18 GACACTGAAGAGACAGTTTCCTATCCTTTTAAACATGATCCTAATTCTGAACTCCTTGG 77
6 --T--L--K--R--Q--F--P--I--L--F--N--M--I--L--I--S--E--L--L--G 26

301 GGCTAGATGGTTTCCTAAACTCTGCCCTGTGATGTCACTCTGGATGCTCCAAATGCCCA 360
78 GGCTAGATGGTTTCCTAAACTCTGCCCTGTGATGTCACTCTGGATGCTCCAAATGCCCA 137
26 --A--R--W--F--P--K--T--L--P--C--D--V--T--L--D--A--P--N--A--H 46

361 TGTGATTGTGGACTGCACAGACAAACATTTGACAGAAATTCCTGGAGGTATTCTTGCCAA 420
138 TGTGATTGTGGACTGCACAGACAAACATTTGACAGAAATTCCTGGAGGTATTCTTGCCAA 197
46 --V--I--V--D--C--T--D--K--H--L--T--E--I--P--G--G--I--P--A--N 66

421 TGCCACCAACCTCACCTCACCATTAACACATAGCAGGCATCTCTCCAGCCTCCTTCCA 480
198 TGCCACCAACCTCACCTCACCATTAACACATAGCAGGCATCTCTCCAGCCTCCTTCCA 257
66 --A--T--N--L--T--L--T--I--N--H--I--A--G--I--S--P--A--S--F--H 86

481 CCGGCTGGACCATCTGGTGGAGATCGATTTCAGGTGCAACTGCATACCTGTTGACTGGG 540
258 CCGGCTGGACCATCTGGTGGAGATCGATTTCAGGTGCAACTGCATACCTGTTGACTGGG 317
86 --R--L--D--H--L--V--E--I--D--F--R--C--N--C--I--P--V--R--L--G 106

541 GCCAAAAGACAACGTGTGCACCAAAAGGCTACAGATTAAACCCAACAGCTTTAGCAAACT 600
318 GCCAAAAGACAACGTGTGCACCAAAAGGCTACAGATTAAACCCAACAGCTTTAGCAAACT 377
106 --P--K--D--N--V--C--T--K--R--L--Q--I--K--P--N--S--F--S--K--L 126

601 CACGTATTTAAAAATCTCTTTACCTGGATGGAAACAGCTTCTAGAAATACCTCAGGATCT 660
378 CACGTATTTAAAAATCTCTTTACCTGGATGGAAACAGCTTCTAGAAATACCTCAGGATCT 437
126 --T--Y--L--K--S--L--Y--L--D--G--N--Q--L--L--E--I--P--Q--D--L 146
```

|      |                                                                |      |
|------|----------------------------------------------------------------|------|
| 661  | TCCTCCCAGCTTACAGCTGCTGAGCCTGGAGGCCAACAACATCTTC TTGATCATGAAGGA  | 720  |
| 438  | TCCTCCCAGCTTACAGCTGCTGAGCCTGGAGGCCAACAACATCTTC TTGATCATGAAGGA  | 497  |
| 146  | --P--P--S--L--Q--L--L--S--L--E--A--N--N--I--F--L--I--M--K--E   | 166  |
|      |                                                                |      |
| 721  | GAATCTAACAGAACTGGCCAACCTAGAAATACTCTACCTGGGCCAAAAC TGT TACTATCG | 780  |
| 498  | GAATCTAACAGAACTGGCCAACCTAGAAATACTCTACCTGGGCCAAAAC TGT TACTATCG | 557  |
| 166  | --N--L--T--E--L--A--N--L--E--I--L--Y--L--G--Q--N--C--Y--Y--R   | 186  |
|      |                                                                |      |
| 781  | TAACCTTGTAATGTTTCATTTACTATCGAAAAAGATGCTTTCCTAAATATGAGAAATTT    | 840  |
| 558  | TAACCTTGTAATGTTTCATTTACTATCGAAAAAGATGCTTTCCTAAATATGAGAAATTT    | 617  |
| 186  | --N--P--C--N--V--S--F--T--I--E--K--D--A--F--L--N--M--R--N--L   | 206  |
|      |                                                                |      |
| 841  | AAAAATTGCTCTCCCTAAAAGATAACAATATCTCAGCTGTCCCACTGTTTGGCCATCTAG   | 900  |
| 618  | AAAAATTGCTCTCCCTAAAAGATAACAATATCTCAGCTGTCCCACTGTTTGGCCATCTAG   | 677  |
| 206  | --K--L--L--S--L--K--D--N--N--I--S--A--V--P--T--V--L--P--S--S   | 226  |
|      |                                                                |      |
| 901  | TTTGACAGAACTCTATCTTTACAATAACATCATTACAAAAATCCAAGAAGATGATTTTAA   | 960  |
| 678  | TTTGACAGAACTCTATCTTTACAATAACATCATTACAAAAATCCAAGAAGATGATTTTAA   | 737  |
| 226  | --L--T--E--L--Y--L--Y--N--N--I--I--T--K--I--Q--E--D--D--F--N   | 246  |
|      |                                                                |      |
| 961  | TAACCTCAGTCAACTACAAGTTCTTGATCTGAGTGGAATTGCCTCGTTGTTATAATGT     | 1020 |
| 738  | TAACCTCAGTCAACTACAAGTTCTTGATCTGAGTGGAATTGCCTCGTTGTTATAATGT     | 797  |
| 246  | --N--L--S--Q--L--Q--V--L--D--L--S--G--N--C--P--R--C--Y--N--V   | 266  |
|      |                                                                |      |
| 1021 | TCCATTTCTTGACACCCCTGTGAAAAATAATTCTCCCCTACAGATTGATCTAAATGCTTT   | 1080 |
| 798  | TCCATTTCTTGACACCCCTGTGAAAAATAATTCTCCCCTACAGATTGATCTAAATGCTTT   | 857  |
| 266  | --P--F--P--C--T--P--C--E--N--N--S--P--L--Q--I--D--L--N--A--F   | 286  |
|      |                                                                |      |
| 1081 | TGATGCATTGACAGAATTGCAAGTCTTACGCCTACACAGTAAC TCTCTTCAGCATGTGCC  | 1140 |
| 858  | TGATGCATTGACAGAATTGCAAGTCTTACGCCTACACAGTAAC TCTCTTCAGCATGTGCC  | 917  |
| 286  | --D--A--L--T--E--L--Q--V--L--R--L--H--S--N--S--L--Q--H--V--P   | 306  |
|      |                                                                |      |
| 1141 | CCAAAGATGGTTTTAAAAACATTAACAAACTTAAAGAACTAGATCTTTCCCAAAACTTCTT  | 1200 |
| 918  | CCAAAGATGGTTTTAAAAACATTAACAAACTTAAAGAACTAGATCTTTCCCAAAACTTCTT  | 977  |
| 306  | --Q--R--W--F--K--N--I--N--K--L--K--E--L--D--L--S--Q--N--F--L   | 326  |
|      |                                                                |      |
| 1201 | GGCCAAAGAAATTGGGGATGCCAAATTTTACATCTTCTTCATAACCTTGTCACCTTGGA    | 1260 |
| 978  | GGCCAAAGAAATTGGGGATGCCAAATTTTACATCTTCTTCATAACCTTGTCACCTTGGA    | 1037 |
| 326  | --A--K--E--I--G--D--A--K--F--L--H--L--L--H--N--L--V--N--L--D   | 346  |
|      |                                                                |      |
| 1261 | TCTGTCTTTCAATTATGATCTTCAGGTC TACCATGCAGTTATAAATCTATCAGATGCATT  | 1320 |
| 1038 | TCTGTCTTTCAATTATGATCTTCAGGTC TACCATGCAGTTATAAATCTATCAGATGCATT  | 1097 |
| 346  | --L--S--F--N--Y--D--L--Q--V--Y--H--A--V--I--N--L--S--D--A--F   | 366  |
|      |                                                                |      |
| 1321 | TTCTTCACTGAAAAAATTGAAAGTTTTCGAATCAAAGGCTACGTCTTTTAAAGAGCTGAA   | 1380 |
| 1098 | TTCTTCACTGAAAAAATTGAAAGTTTTCGAATCAAAGGCTACGTCTTTTAAAGAGCTGAA   | 1157 |
| 366  | --S--S--L--K--K--L--K--V--L--R--I--K--G--Y--V--F--K--E--L--N   | 386  |
|      |                                                                |      |
| 1381 | TAGTTTAAACCTCTTCCATTATGTAATCTTCCCAGTCTTGAAGTTCTTGATCTTGGCAC    | 1440 |
| 1158 | TAGTTTAAACCTCTTCCATTATGTAATCTTCCCAGTCTTGAAGTTCTTGATCTTGGCAC    | 1217 |
| 386  | --S--L--N--L--F--P--L--C--N--L--P--S--L--E--V--L--D--L--G--T   | 406  |

|      |                                                              |                                                  |                                                     |      |
|------|--------------------------------------------------------------|--------------------------------------------------|-----------------------------------------------------|------|
| 1441 | TAAC                                                         | TTTATT                                           | AAAAATTGCTGACCTCAGCATATTTAAACAATTTAAACATTGAAAATTCAT | 1500 |
| 1218 | TAAC                                                         | TTTATT                                           | AAAAATTGCTGACCTCAGCATATTTAAACAATTTAAACATTGAAAATTCAT | 1277 |
| 406  | --N--F--I--K--I--A--D--L--S--I--F--K--Q--F--K--T--L--K--F--I |                                                  |                                                     | 426  |
|      |                                                              |                                                  |                                                     |      |
| 1501 | TGAT                                                         | CTTTCAGTGAATAAAATATCACCTTCGGGAGATTCAACTGAAGGTGGT | TTCTGCTC                                            | 1560 |
| 1278 | TGAT                                                         | CTTTCAGTGAATAAAATATCACCTTCGGGAGATTCAACTGAAGGTGGT | TTCTGCTC                                            | 1337 |
| 426  | --D--L--S--V--N--K--I--S--P--S--G--D--S--T--E--G--G--F--C--S |                                                  |                                                     | 446  |
|      |                                                              |                                                  |                                                     |      |
| 1561 | TAAC                                                         | ATGAGA                                           | ACTTCTGTAGAAGGCCATGGGCCCAGGTCCTTGAAGCATTCGATTATTT   | 1620 |
| 1338 | TAAC                                                         | ATGAGA                                           | ACTTCTGTAGAAGGCCATGGGCCCCAGGTCCTTGAAGCATTCGATTATTT  | 1397 |
| 446  | --N--M--R--T--S--V--E--G--H--G--P--Q--V--L--E--A--L--H--Y--F |                                                  |                                                     | 466  |
|      |                                                              |                                                  |                                                     |      |
| 1621 | CAGATATGATGAGTATGCAAGGAGTTGCGGTCCAAGAGCAAAGAGCCTCCTTCTTTCTT  |                                                  |                                                     | 1680 |
| 1398 | CAGATATGATGAGTATGCAAGGAGTTGCCGGTCCAAGAGCAAAGAGCCTCCTTCTTTCTT |                                                  |                                                     | 1457 |
| 466  | --R--Y--D--E--Y--A--R--S--C--R--S--K--S--K--E--P--P--S--F--L |                                                  |                                                     | 486  |
|      |                                                              |                                                  |                                                     |      |
| 1681 | ACCTCTTAATGAAGATTGTTATATGTATGGGCAGACCTTGACCTTAGTAGAAATAATAT  |                                                  |                                                     | 1740 |
| 1458 | ACCTCTTAATGAAGATTGTTATATGTATGGGCAGACCTTGACCTTAGTAGAAATAATAT  |                                                  |                                                     | 1517 |
| 486  | --P--L--N--E--D--C--Y--M--Y--G--Q--T--L--D--L--S--R--N--N--I |                                                  |                                                     | 506  |
|      |                                                              |                                                  |                                                     |      |
| 1741 | ATTTT                                                        | TTTATCAAGTCTTCTGATTTC                            | CAGCATCTTTCTTTCTCAAATGCCTAAACTTTATC                 | 1800 |
| 1518 | ATTTT                                                        | TTTATCAAGTCTTCTGATTTC                            | CAGCATCTTTCTTTCTCAAATGCCTAAACTTTATC                 | 1577 |
| 506  | --F--F--I--K--S--S--D--F--Q--H--L--S--F--L--K--C--L--N--L--S |                                                  |                                                     | 526  |
|      |                                                              |                                                  |                                                     |      |
| 1801 | AGGAAATAGCATTAGCCAGACGCTTAATGGAAGTGAATTT                     | CAGCCTTTAGTG                                     | GAGTTGAA                                            | 1860 |
| 1578 | AGGAAATAGCATTAGCCAGACGCTTAATGGAAGTGAATTT                     | CAGCCTTTAGTG                                     | GAGTTGAA                                            | 1637 |
| 526  | --G--N--S--I--S--Q--T--L--N--G--S--E--F--Q--P--L--V--E--L--K |                                                  |                                                     | 546  |
|      |                                                              |                                                  |                                                     |      |
| 1861 | ATATTTGGACTTCTCTAACAAATCGGCTTGATTTACTCTACTCAACGGCATTT        | GAGGAGCT                                         |                                                     | 1920 |
| 1638 | ATATTTGGACTTCTCTAACAAATCGGCTTGATTTACTCTACTCAACGGCATTT        | GAGGAGCT                                         |                                                     | 1697 |
| 546  | --Y--L--D--F--S--N--N--R--L--D--L--L--Y--S--T--A--F--E--E--L |                                                  |                                                     | 566  |
|      |                                                              |                                                  |                                                     |      |
| 1921 | GCACAACCTGGAAGTCCTAGATATAAGTAGTAACAGCCATTATTTTCAATCAGAAGGAAT |                                                  |                                                     | 1980 |
| 1698 | GCACAACCTGGAAGTCCTAGATATAAGTAGTAACAGCCATTATTTTCAATCAGAAGGAAT |                                                  |                                                     | 1757 |
| 566  | --H--N--L--E--V--L--D--I--S--S--N--S--H--Y--F--Q--S--E--G--I |                                                  |                                                     | 586  |
|      |                                                              |                                                  |                                                     |      |
| 1981 | TACTCACATGCTAAATTTTACCAAGAACCTCAAGGTTCTGAAGAACTGATGATGAAC    | TA                                               |                                                     | 2040 |
| 1758 | TACTCACATGCTAAATTTTACCAAGAACCTCAAGGTTCTGAAGAACTGATGATGAAC    | TA                                               |                                                     | 1817 |
| 586  | --T--H--M--L--N--F--T--K--N--L--K--V--L--K--K--L--M--M--N--Y |                                                  |                                                     | 606  |
|      |                                                              |                                                  |                                                     |      |
| 2041 | TAATGACATCGCTACCTCCACCAGCAGGACCATGGAGAGTGAATCTCTTCAAATCCTGGA |                                                  |                                                     | 2100 |
| 1818 | TAATGACATCGCTACCTCCACCAGCAGGACCATGGAGAGTGAATCTCTTCAAATCCTGGA |                                                  |                                                     | 1877 |
| 606  | --N--D--I--A--T--S--T--S--R--T--M--E--S--E--S--L--Q--I--L--E |                                                  |                                                     | 626  |
|      |                                                              |                                                  |                                                     |      |
| 2101 | GTTCAGAGGCAACCATTTGGATATTTTATGGAGAGATGGTGATAACAGATAC         | TTAAAAAT                                         |                                                     | 2160 |
| 1878 | GTTCAGAGGCAACCATTTGGATATTTTATGGAGAGATGGTGATAACAGATAC         | TTAAAAAT                                         |                                                     | 1937 |
| 626  | --F--R--G--N--H--L--D--I--L--W--R--D--G--D--N--R--Y--L--K--F |                                                  |                                                     | 646  |
|      |                                                              |                                                  |                                                     |      |
| 2161 | CTTCAAGAATCTGCTAAACTTAGAAGAGCTAGACATCTCTGAAAAT               | TCTCTGAGTTTCTT                                   |                                                     | 2220 |
| 1938 | CTTCAAGAATCTGCTAAACTTAGAAGAGCTAGACATCTCTGAAAAT               | TCTCTGAGTTTCTT                                   |                                                     | 1997 |
| 646  | --F--K--N--L--L--N--L--E--E--L--D--I--S--E--N--S--L--S--F--L |                                                  |                                                     | 666  |

|      |                                                               |      |
|------|---------------------------------------------------------------|------|
| 2221 | ACCTTTGGGAGTTTTTTGACAGTATGCCTCCAAATCTAAAGACTCTCTCCTTGGCCAAAAA | 2280 |
| 1998 | ACCTTTGGGAGTTTTTTGACAGTATGCCTCCAAATCTAAAGACTCTCTCCTTGGCCAAAAA | 2057 |
| 666  | --P--L--G--V--F--D--S--M--P--P--N--L--K--T--L--S--L--A--K--N  | 686  |

|      |                                                               |      |
|------|---------------------------------------------------------------|------|
| 2281 | TGGGCTCAAGTCTTTTCAGTTGGAAAAGGACTACAGAGTCTGAAGAATCTAGAACTTTGGA | 2340 |
| 2058 | TGGGCTCAAGTCTTTTCAGTTGGAAAAGGACTACAGAGTCTGAAGAATCTAGAACTTTGGA | 2117 |
| 686  | --G--L--K--S--F--S--W--K--G--L--Q--S--L--K--N--L--E--T--L--D  | 706  |

**LWLT0100021.1\_50703293\_T/C synonymous variant**

|      |                                                              |      |
|------|--------------------------------------------------------------|------|
| 2341 | CCTCAGCTTCAACCAGCTGAAGACTGTCCTGAGAGATTATCCAACGTGTCCCGCAGCCT  | 2400 |
| 2118 | CCTCAGCTTCAACCAGCTGAAGACTGTCCCTGAGAGATTATCCAACGTGTCCCGCAGCCT | 2177 |
| 706  | --L--S--F--N--Q--L--K--T--V--P--E--R--L--S--N--C--S--R--S--L | 726  |

|      |                                                              |      |
|------|--------------------------------------------------------------|------|
| 2401 | CAAGAACTCATACTTAAGAATAATCAAATCAGGTGCCTGACAAAGTATTTCTCCAAGG   | 2460 |
| 2178 | CAAGAACTCATACTTAAGAATAATCAAATCAGGTGCCTGACAAAGTATTTCTCCAAGG   | 2237 |
| 726  | --K--K--L--I--L--K--N--N--Q--I--R--C--L--T--K--Y--F--L--Q--G | 746  |

|      |                                                              |      |
|------|--------------------------------------------------------------|------|
| 2461 | TGCTTTCAGTTGCGACATCTGGACCTCAGCTCAAATAAAATTAGGTTATCCAAAAGAC   | 2520 |
| 2238 | TGCTTTCAGTTGCGACATCTGGACCTCAGCTCAAATAAAATTAGGTTATCCAAAAGAC   | 2297 |
| 746  | --A--F--Q--L--R--H--L--D--L--S--S--N--K--I--Q--V--I--Q--K--T | 766  |

|      |                                                               |      |
|------|---------------------------------------------------------------|------|
| 2521 | GAGTTTTCCAGAAAACGTCCTCAACAATCTAAACATTTTGTGTTTTGCATCACAATCGATT | 2580 |
| 2298 | GAGTTTTCCAGAAAACGTCCTCAACAATCTAAACATTTTGTGTTTTGCATCACAATCGATT | 2357 |
| 766  | --S--F--P--E--N--V--L--N--N--L--N--I--L--F--L--H--H--N--R--F  | 786  |

|      |                                                              |      |
|------|--------------------------------------------------------------|------|
| 2581 | TCTGTGCAACTGTGATGCTGTGTGGTTTGTCTGGTGGGTTAACCATACCGAGGTGACTAT | 2640 |
| 2358 | TCTGTGCAACTGTGATGCTGTGTGGTTTGTCTGGTGGGTTAACCATACCGAGGTGACTAT | 2417 |
| 786  | --L--C--N--C--D--A--V--W--F--V--W--W--V--N--H--T--E--V--T--I | 806  |

|      |                                                              |      |
|------|--------------------------------------------------------------|------|
| 2641 | TCCTTACTTGGCCACAGATGTGACTTGCATGGGACCAGGAGCACACAAGGGCCAGAGTGT | 2700 |
| 2418 | TCCTTACTTGGCCACAGATGTGACTTGCATGGGACCAGGAGCACACAAGGGCCAGAGTGT | 2477 |
| 806  | --P--Y--L--A--T--D--V--T--C--M--G--P--G--A--H--K--G--Q--S--V | 826  |

|      |                                                              |      |
|------|--------------------------------------------------------------|------|
| 2701 | GGTCTCTCTGGATCTATATACCTGTGAGTTAGATTGACTAACTTCATCCTGTTCTCACT  | 2760 |
| 2478 | GGTCTCTCTGGATCTATATACCTGTGAGTTAGATTGACTAACTTCATCCTGTTCTCACT  | 2537 |
| 826  | --V--S--L--D--L--Y--T--C--E--L--D--L--T--N--F--I--L--F--S--L | 846  |

|      |                                                              |      |
|------|--------------------------------------------------------------|------|
| 2761 | TTCCATATCAGCAATTCTCTCTCTGATGATGATCACAACAGCAAACCATCTCTATTTCTG | 2820 |
| 2538 | TTCCATATCAGCAATTCTCTCTCTGATGATGATCACAACAGCAAACCATCTCTATTTCTG | 2597 |
| 846  | --S--I--S--A--I--L--S--L--M--M--I--T--T--A--N--H--L--Y--F--W | 866  |

|      |                                                              |      |
|------|--------------------------------------------------------------|------|
| 2821 | GGATGTGTGGTATAGTTATCATTTCTGTAAAGCCAAAATAAAAGGGTATCGACGTCTGAT | 2880 |
| 2598 | GGATGTGTGGTATAGTTATCATTTCTGTAAAGCCAAAATAAAAGGGTATCGACGTCTGAT | 2657 |
| 866  | --D--V--W--Y--S--Y--H--F--C--K--A--K--I--K--G--Y--R--R--L--I | 886  |

|      |                                                              |      |
|------|--------------------------------------------------------------|------|
| 2881 | ATCACCCAATTCTTGCTATGATGCTTTCATTGTATATGACACTAAAGACCCAGCAGTGAC | 2940 |
| 2658 | ATCACCCAATTCTTGCTATGATGCTTTCATTGTATATGACACTAAAGACCCAGCAGTGAC | 2717 |
| 886  | --S--P--N--S--C--Y--D--A--F--I--V--Y--D--T--K--D--P--A--V--T | 906  |

|      |                                                             |      |
|------|-------------------------------------------------------------|------|
| 2941 | AGAGTGGGTTTGGACGAGCTGGTGGCCAAATTGGAAGACCCGAGAGAGAAGTGTTTTAA | 3000 |
| 2718 | AGAGTGGGTTTGGACGAGCTGGTGGCCAAATTGGAAGACCCGAGAGAGAAGTGTTTTAA | 2777 |

|      |                                                               |      |
|------|---------------------------------------------------------------|------|
| 906  | --E--W--V--L--D--E--L--V--A--K--L--E--D--P--R--E--K--C--F--N  | 926  |
| 3001 | TTATGTCTTGAGGAAAGAGACTGGTTACAGGGCAGCCTGTTCTGGAAAATCTTTCCCA    | 3060 |
| 2778 | TTTATGTCTTGAGGAAAGAGACTGGTTACCAGGGCAGCCTGTTCTGGAAAATCTTTCCCA  | 2837 |
| 926  | --L--C--L--E--E--R--D--W--L--P--G--Q--P--V--L--E--N--L--S--Q  | 946  |
| 3061 | GAGCATAAGCTTAGCAAAAAGACAGTGTTTGTGATGACAGACAAGTACGCAAAGACTGA   | 3120 |
| 2838 | GAGCATAAGCTTAGCAAAAAGACAGTGTTTGTGATGACAGACAAGTACGCAAAGACTGA   | 2897 |
| 946  | --S--I--Q--L--S--K--K--T--V--F--V--M--T--D--K--Y--A--K--T--E  | 966  |
| 3121 | GAATTTTAAGATAGCATTTTACTTATCCCATCAGAGGCTCATGGATGAAAAAGTGGATGT  | 3180 |
| 2898 | GAATTTTAAGATAGCATTTTACTTATCCCATCAGAGGCTCATGGATGAAAAAGTGGATGT  | 2957 |
| 966  | --N--F--K--I--A--F--Y--L--S--H--Q--R--L--M--D--E--K--V--D--V  | 986  |
| 3181 | AATCATCTTGATATTCTTGAGAAAGCCCTTCAGAAGTCCAAGTTTCTCCAAGTCCGGAA   | 3240 |
| 2958 | AATCATCTTGATATTCTTGAGAAAGCCCTTCAGAAGTCCAAGTTTCTCCAAGTCCGGAA   | 3017 |
| 986  | --I--I--L--I--F--L--E--K--P--L--Q--K--S--K--F--L--Q--L--R--K  | 1006 |
| 3241 | GAGGCTCTGTGGCAGTTCTGTCTTGAGTGGCCAACAACCCACAGGCTCACCCGTACTT    | 3300 |
| 3018 | GAGGCTCTGTGGCAGTTCTGTCTTGAGTGGCCAACAACCCACAGGCTCACCCGTACTT    | 3077 |
| 1006 | --R--L--C--G--S--S--V--L--E--W--P--T--N--P--Q--A--H--P--Y--F  | 1026 |
| 3301 | CTGGCAGTGTCTGAAAAATGCCCTGGCCACAGACAATCACGTGACCTACAGTCAGGTGTT  | 3360 |
| 3078 | CTGGCAGTGTCTGAAAAATGCCCTGGCCACAGACAATCACGTGACCTACAGTCAGGTGTT  | 3137 |
| 1026 | --W--Q--C--L--K--N--A--L--A--T--D--N--H--V--T--Y--S--Q--V--F  | 1046 |
| 3361 | CAAAGAGACAGCCTAGCCCTTCTTTGCCGAATGTGACTGCTACCAAGGAGAAGCTCAGCT  | 3420 |
| 3138 | CAAAGAGACAGCCTAG.....                                         | 3153 |
| 1046 | --K--E--T--A--*--.....                                        | 1050 |
| 3421 | GCCTTGATCGGCTCACCCATGCCTTGCCAGAAGAGTGTTCTAAGATTCTCCAAGCCCTGG  | 3480 |
|      | .....                                                         |      |
|      | .....                                                         |      |
| 3481 | GATTGCCCATATTGGAGAGGAGTCACCAATACATAACAAAGGAAGCAGAAAAATGGGATT  | 3540 |
|      | .....                                                         |      |
|      | .....                                                         |      |
|      | <b>LWLT01000021.1_50702074_T/C 3'UTR variant</b>              |      |
| 3541 | TATATAAGCATCAAGTCATCTTTCTCAGCTCTCTCTGTCTCCATTTGCACTTGAGTCTTT  | 3600 |
|      | .....                                                         |      |
|      | .....                                                         |      |
| 3601 | GTCTTCTGCCCTTGCAATAAAATACTGTTGGGAGAAGGGTGGCAAGTAGAGGATGTGGGAC | 3660 |
|      | .....                                                         |      |
|      | .....                                                         |      |
| 3661 | TTTGATTCTCCTGTAATTGTGATTATTACATATACACAGTCACCAAGAACTGCACTTC    | 3720 |
|      | .....                                                         |      |
|      | .....                                                         |      |

|      |                                                              |      |
|------|--------------------------------------------------------------|------|
| 3721 | TACCCCTCAAGAGGCACTGGTATGTATAGAAATAGGGTTAAAAAAAGGCTCAGAGTCTGC | 3780 |
|      | .....                                                        |      |
|      | .....                                                        |      |
| 3781 | TTATATGACATTAAATGTACCAGTTAATTAGTGGTAAAAATAAGACACAGTTAACTCC   | 3840 |
|      | .....                                                        |      |
|      | .....                                                        |      |
| 3841 | TCAGCCAATTGACTCAACCATCTAGTGCCCCGTTCTGTGCAGACCAAGTGCTGGCCCCCA | 3900 |
|      | .....                                                        |      |
|      | .....                                                        |      |
| 3901 | GCAGGTGGTACAGCTCAAGTGCTCCTTGCTCTTTCTCTCCTGGGCCTGTTACTGGGTTTT | 3960 |
|      | .....                                                        |      |
|      | .....                                                        |      |
| 3961 | TTGGGGAAATAGAAACATCTTTGTCATCGATGGACATAGTCTACTTACAAGTGGGAGAAG | 4020 |
|      | .....                                                        |      |
|      | .....                                                        |      |
| 4021 | AATAAAGTCATGCTCTTTACTTTTGATGATAATTTACCTGCTTAAATATGGCTCTGGACT | 4080 |
|      | .....                                                        |      |
|      | .....                                                        |      |
| 4081 | AAATGTTGAAATCCTAATCCCCAGTGTGATGGTGTGGGAGGTGGGAGGTGGGGTTTTT   | 4140 |
|      | .....                                                        |      |
|      | .....                                                        |      |
| 4141 | AAGAAGTGGTTAGGTCATGAGACTGGAGCCCTCGTGATGGGATTACTGCCTTAGAAGAAG | 4200 |
|      | .....                                                        |      |
|      | .....                                                        |      |
| 4201 | CAGTCAGGGGACTAACTTGCTGTGTTCCCATCGTGAGGGTATGGAGAGAGGCTGGCAG   | 4260 |
|      | .....                                                        |      |
|      | .....                                                        |      |
| 4261 | TCTATAACACACAGGAGGACCCTCAGCAGAACCAGATCATATTGACACTCTGATCTCCTT | 4320 |
|      | .....                                                        |      |
|      | .....                                                        |      |
|      |                                                              |      |
|      | LWLT01000021.1_50701297_c/t                                  |      |
| 4321 | CAGACTGGCTTCCATGCTTCAGACTTGTGAGAAATAAATGTTTGTCTTTAAGTCATGCA  | 4380 |
|      | .....                                                        |      |
|      | .....                                                        |      |
| 4381 | GTTTGTGATGTTTTGTACAGCAGCTGAGCTAAGACAGATTTTTTTAATCTGCATGGCAA  | 4440 |
|      | .....                                                        |      |
|      | .....                                                        |      |
| 4441 | AGTACTGTTTCCAAAGAAAAGTTGCCTCATCCAATGATCTTTCAAAGTCTTTATTAAGT  | 4500 |
|      | .....                                                        |      |

.....

4501 AATACTGTATACTTGTAATTATCTGAAAACCTTGATCCATCAATGTCAGACAGCTTTGATG 4560  
.....  
.....

4561 ATAAACTCTAAAGGAGAACCCAAGAGCATATATTTATTTAGAGTTAGCAAGCAGGGATGA 4620  
.....  
.....

4621 CAGTCACATGGATTCCCTTTAAATTTGGAGGCTGGGGGAGGAACAGAGGTTTACCACCATT 4680  
.....  
.....

4681 AACACTGAGAAAGCTTCAGTCTTGAGCTTTGGCTTCAGTACTAAAAAAAAAAAAAAAAAAAA 4740  
.....  
.....

4741 AAAACACCAGAAAGGACCAAGATGTTCTGAAGACACACATACTTTCTAAGTGTCTATAAA 4800  
.....  
.....

4801 TTTGCATGAGTCCAAAGTCTGAAATGTGACCTGTTTGTTTTATTTTCATGAAAGAAGTTA 4860  
.....  
.....

4861 TCTACAGAGGTGTCTGCGCCCTTTGAAAGATAGCTTCAAATCCCAGACTTCAAATTATCT 4920  
.....  
.....

4921 GGGAGATAACTGTGTTTTCTTCATCTATGGAAAAGCCAAAGGTTTTACTCTGAGGATGGC 4980  
.....  
.....

4981 TATATGTATTATTTCCAAAGGACATGTAATCAATAAGGGTCACAAACTCCCAAATTAATC 5040  
.....  
.....

5041 TCTGGAATCAACAGAGCCAGCTGTCTGATAGCCTCGGTAAGCTCGATTGTACTTCATAGG 5100  
.....  
.....

5101 CGCCTACGTGAAAACACAGATAACGCCATAAAAACTGGCTGTTGGCATCATCAATTTCTT 5160  
.....  
.....

5161 CTATTACAACACATAACTATACAAGGTTTAAAGTTATTTTGGTGATTATATAAACCATGAAG 5220  
.....  
.....

5221 CACTTGAAGACAAACATCTTCTGAAATGAACCAAGAGGAAGGGAAACTGACAACACAAC 5280  
.....

```

.....
5281 CAGAAACCGCAGTGTATTTCAACATGAGGCTGTGCAGCAGTGGTTTGTGTAGGAAATGA 5340
.....
5341 CCCAAAGCACAGTAACAGGTGGTTCATTTTAATTCCTTTGTATCTTGACAAGTCACTC 5400
.....
5401 TGTTAATCTCCTGAGGGTCCTCTGTGGAGTCCTATACCATTAGAGCCATTCATAGATGGC 5460
.....
5461 TCGGCTCGAAAGCCACCAACTCAGGCCACCAGGAGAACATGACTGCTAGGTCCCCTGCCA 5520
.....
5521 AGCTCTGAGTATGGAAGAGACTCCAGATTGTCCATGGATCCCATGCTACCATGAAGGGGT 5580
.....
5581 TCCCAACCACTTCCAGCCCTGAACCTGTCCTTCCTCCTCGGATAGAGACTGTACCTTAGC 5640
.....
5641 ACGACTTGGGCATTTGTAGGATCCAAGCCAAGAGAGGCATTGGGCAG 5687
.....

```

Genomic DNA (reverse strand) sequence with SNP and primers localization:

<sup>1</sup>LWLT01000021.1\_50718760\_G/A promoter variant

<sup>2</sup>LWLT01000021.1\_50718645\_C/T 5'UTR variant

<sup>3</sup>LWLT01000021.1\_1: 50718466\_C/T intron variant

```

CTGCCCCTGCTTAGAAACCAGAGTCCCTTTTCAGCTGAGCCTAAGAGAGAACAAGGGAAAT
GTAGACATGTCTCAAAGATACCTGTAGAATGACGGTTCTCAGTCAGGGGCCGGGGATGTG
TTACAATGTCTAGAGACATCTGTGATTGTTGAGGGGCAGTGTGGCTGGCATCTCATGGGC
TCAGGTCAGGGTTGCTGCTCAGTGTCTTACAATGCCACAAAGATGTATCTCACCAGAAAT
GGCAGGAGTGCACCAGTTGAGAACTTCTAGAAAAAACATCAGCCAGCCAAGTTGCTTG
AATTTAGACATGAGGTTGCCCTGATTG1GGTGGTAGAAATAGAAGGAACCTGCTGCTTCT
GCAAACCTCATGTCTGAGATGGCATAAATAGTCACACTCCTCCCCCACCCTGTAACCAG
TCTTTGCACTTGGAAGTTACG2ACTGGCAGCCTGCAGTCTCCATGACTTAAGTAGGTTT
GCCACAGCTCATCTCTTACCTCAGAAGACTCCAGACCTGGACTCACTCCATGCAGCAAA
GAAAGGTATGTTAAACATTGGGAAAACTCAGATCATTTAAGTACCTAGATCTGTGAGCC
ATTCTCAAAGAGAAGGGGAGAG3AGGGGAAGGGACCCAAATCATACGCAAAACAATTTTTT
TTTTTTTTTTTGAATCTAAAGAAGCGTTTTTGGTAGTCTCAAATGTCACTTCTTTGAAGA
TAAAGTCAGACTTTTACAATAATGCTGGAAATGGTTTTCTGGAGTGTATCTCTGTCTGT
ATAATTTTGAGGAAGTAAATACTATTAATAGGTGTTTTCAACAGCATATATTAAGCAGC
CTTCCAGCACGTTTTGAAGCGTCAATCCTTTGCTGTCTTTGCAAGGTAAAGTTTGGTGT
TTTCTCTTTATCTTAGTTGATGCTACTGGGTCCATCTCAGGCTGATCTTGACACCTTCCA
TGTTCTGCTCTCTTCAGCCAGACTTGTCTGTTTCATTTTGGGAAGAAGACTAAAAATGGTA
AGGACAGCTAAGAGATCCCTAAAAAGTGTTATTTGTCTTTTTTGTGGGAAGAAGTAAAA
CTGACTAGCAAGAGAGATGTTTAAGTTATCTGTACTTCAGTTATTTACTGAAGAAAAGTT

```

TCATGATCTTTCATAAACAAAGATTAATCATGGGGGTATTGTGTAATTTCAATTAATTAAG  
ATTAATCAATACTTGTCTGTGTTCTCCTTCCTATGGACTTCCCTAGTGGCTCAGATAGTAG  
TAATTTCAATTAAGA

LWLT01000021.1\_50703293\_T/C synonymous variant

GTCCTAGATATAAGTAGTAACAGCCATTATTTTCAATCAGAAGGAATTACTCACATGCTA  
AATTTTACCAAGAACCTCAAGGTTCTGAAGAACTGATGATGAACATAATGACATCGCT  
ACCTCCACCAGCAGGACCATGGAGAGTGAATCTCTTCAAATCCTGGAGTTCAGAGGCAAC  
CATTTGGATATTTTATGGAGAGATGGTGATAACAGATACTTAAAATTCTTCAAGAATCTG  
CTAAACTTAGAAGAGCTAGACATCTCTGAAAATTCCTGAGTTTCTTACCTTTGGGAGTT  
TTTGACAGTATGCCTCCAAATCTAAAGACTCTCTCCTTGGCCAAAAATGGGCTCAAGTCT  
TTCAGTTGGAAAGGACTACAGAGTCTGAAGAATCTAGAACTTTGGACCTCAGCTTCAAC  
CAGCTGAAGACTGTCCCTGAGAGATTATCCAACTGTTCCCGCAGCCTCAAGAACTCATA  
CTTAAGAATAATCAAATCAGGTGCCTGACAAAGTATTTTCTCCAAGGTGCTTTCCAGTTG  
CGACATCTGGACCTCAGCTCAAATAAAATTCAGGTTATCCAAAAGACGAGTTTCCAGAA  
AACGTCCTCAACAATCTAAACATTTTGTCTTGTGATCACAATCGATTTCTGTGCAACTGT  
GATGCTGTGTGGTTTGTCTGGTGGGTTAACCATACCGAGGTGACTATTCCCTTACTTGGCC  
ACAGATGTGACTTGCATGGGACCAGGAGCACACAAGGGCCAGAGTGTGGTCTCTCTGGAT  
CTATATACCTGTGAGTTAGATTTGACTAACTTCATCCTGTTCTCACTTTCCATATCAGCA  
ATTCTCTCTCTGATGATGATCACAACAGCAAACCATCTCTATTTCTGGGATGTGTGGTAT  
AGTTATCATTTCTGTAAAGCCAAAATAAAAGGGTATCGACGTCTGATATCACCCAATTCT  
TGCTATGATGCTTTCATTGTATATGACACTAAAGACCCAGCAGTGACAGAGTGGGTTTTG  
GACGAGCTGGTGGCCAAATTGGAAGACCCGAGAGAGAAGTGTTTTAATTTATGTCTTGAG  
GAAAGAGACTGGTTACCAGGGCAGCCTGTTCTGGAAAAATCTTCCAGAGCATACAGCTT  
AGCAAAAAGACAGTGTTTGTGATGACAGACAAGTACGCAAAGACTGAGAATTTTAAGATA  
GCATTTTACTTATCCCATCAGAGGCTCATGGAT

LWLT01000021.1\_50702074\_T/C 3'UTR variant

CATTTTACTTATCCCATCAGAGGCTCATGGATGAAAAAGTGGATGTAATCATCTTGATA  
TTCCCTTGAGAAGCCCCCTTCAGAAGTCCAAGTTTCTCCAACCTCCGGAAGAGGCTCTGTGGC  
AGTTCGTGCTTGTGAGTGGCCAACAAACCCACAGGCTCACCCGTACTTCTGGCAGTGTCTG  
AAAAATGCCCTGGCCACAGACAATCACGTGACCTACAGTCAGGTGTTCAAAGAGACAGCC  
TAGCCCTTCTTTGCCGAATGTGACTGCTACCAAGGAGAAGCTCAGCTGCCTTGATCGGCT  
CACCCATGCCTTGCAGAGAAGAGTGTTCTAAGATTCTCCAAGCCCTGGGATTGCCCATATT  
GGAGAGGAGTCACCAATACATAACAAAGGAAGCAGAAAAATGGGATTTATATAAGCATCA  
AGTCATCTTTCTCAGCTCTCTCTGTCTCCATTGCACTTGAGTCTTTGTCTTCTGCCCTT  
GCATAAAATACTGTTGGGAGAAGGGTGGCAAGTAGAGGATGTGGGACTTTGATTCTCCTG  
TAATTGTGATTATTACATATACACACAGTCCACCAAGAACTGCACCTTCTACCTCAAGAGG  
CACTGGTATGTATAGAAATAGGGTTAAAAAAAAGGCTCAGAGTCTGCTTATATGACATTA  
AAATGTACCAGTTAATTAGTGGTAAAAATAAAGACACAGTTAACTCCTCAGCCAAATTGAC  
TCAACCATCTAGTGCCCCGTTCTGTGCAGACCAAGTGCTGGCCCCCAGCAGGTGGTACAG  
CTCAAGTGCTCCTTGCTCTTTCTCTCCTGGGCCTGTTACTGGGTTTTTTGGGGAAATAGA  
AACATCTTTGTGTCATCGATGGACATAGTCTACTTACAAGTGGGAGAAGAATAAAGTCATGC  
TCTTTACTTTTGTGATGATAATTTACCTGCTTAAATATGGCTCTGGACTAAATGTTGAAATC  
CTAATCCCCCAGTGTGATGGTGTGGGAGGTGGGAGGTGGGGTTTTTAAGAAGTGGTTAG  
GTCATGAGACTGGAGCCCTCGTGAT

LWLT01000021.1\_50701297\_C/T 3'UTR variant

CTCAAGTGCTCCTTGCTCTTTCTCTCCTGGGCCTGTTACTGGGTTTTTTGGGGAAATAGA  
AACATCTTTGTGTCATCGATGGACATAGTCTACTTACAAGTGGGAGAAGAATAAAGTCATGC  
TCTTTTACTTTTGTGATGATAATTTACCTGCTTAAATATGGCTCTGGACTAAATGTTGAAATC  
CTAATCCCCCAGTGTGATGGTGTGGGAGGTGGGAGGTGGGGTTTTTAAGAAGTGGTTAG  
GTCATGAGACTGGAGCCCTCGTGATGGGATTACTGCCTTAGAAGAAGCAGTCAGGGGACT  
AATTGCTGTGTTCCCATCGTGTGAGGGTATGGAGAGAGGCTGGCAGTCTATAACACACA  
GGAGGACCTCAGCAGAACCAGATCATATTGACACTCTGATCTCCTTCAGACTGGCTTCC  
ATGCTTCAGACTTGTGAGAAATAAATGTTTGTCTTTAAGTCATGCAGTTTGTGATGTTT

TGTTACAGCAGCTGAGCTAAGACAGATTTTTTTAATCTGCATGGCAAAGTACTGTTTCCA  
AAGAAAAGTTGCCTCATCCAATGATCTTTCAAACTGCTTTATTAATACTGTATACT  
TGTAATTATCTGAAAAGTTGATCCATCAATGTCAGACAGCTTTGATGATAAACTCTAAAG  
GAGAACCAAGAGCATATATTTATTTAGAGTTAGCAAGCAGGGATGACAGTCACATGGAT
