# Supplementary material for: Single Nucleotide Polymorphisms in Genes Encoding Toll-Like Receptors 7 and 8 and Their Association with Proviral Load of SRLVs in Goats of Polish Carpathian Breed
Source: Animals (Basel). 2021 Jun 26;11(7):1908. doi: 10.3390/ani11071908 (PMC8300119; doi:10.3390/ani11071908)
Supplement: Supplementary file 1 [file animals-11-01908-s001.zip › Supplementary Figure S2. The exact TLR8 SNPs localization based on transcript and genomic sequence..pdf]

**Gene: TLR8 ENSCHIG00000016625**

**Transcript: TLR8-201 ENSCHIT00000024133.1**

**Genome assembly: ARS1 (GCA\_001704415.1) Ensembl**

cDNA sequence with SNP localization:

|                                                     |                                                              |         |         |         |         |         |         |          |        |           |     |
|-----------------------------------------------------|--------------------------------------------------------------|---------|---------|---------|---------|---------|---------|----------|--------|-----------|-----|
| 1                                                   | ATGACCCTT                                                    | CGCTTT  | TTGCTT  | CTGACC  | TCCCTTT | CCTG    | CTCATC  | TCCGAT   | TCC    | TGTGAG    | 60  |
| 1                                                   | ATGACCCTT                                                    | CGCTTT  | TTGCTT  | CTGACC  | TCCCTTT | CCTG    | CTCATC  | TCCGAT   | TCC    | TGTGAG    | 60  |
| 1                                                   | -M--T--L--R--F--L--L--L--T--S--L--F--L--L--I--S--D--S--C--E- |         |         |         |         |         |         |          |        |           | 20  |
| 61                                                  | TTCTT                                                        | CACTGA  | AGCCAGT | TATCCCC | GAAGC   | TATCCT  | TGCGAT  | GTGAAAA  | ACAAAA | TGGC      | 120 |
| 61                                                  | TTCTT                                                        | CACTGA  | AGCCAGT | TATCCCC | GAAGC   | TATCCT  | TGCGAT  | GTGAAAA  | ACAAAA | TGGC      | 120 |
| 21                                                  | -F--F--T--E--A--S--Y--P--R--S--Y--P--C--D--V--K--N--K--N--G- |         |         |         |         |         |         |          |        |           | 40  |
| 121                                                 | TCTTT                                                        | TATTGC  | AGAATGT | AACAGT  | CGT     | CGATTAC | AGGAAGT | TACCCCAA | ACAGT  | GGACAAA   | 180 |
| 121                                                 | TCTTT                                                        | TATTGC  | AGAATGT | AACAGT  | CGT     | CGATTAC | AGGAAGT | TACCCCAA | ACAGT  | GGACAAA   | 180 |
| 41                                                  | -S--F--I--A--E--C--N--S--R--R--L--Q--E--V--P--Q--T--V--D--K- |         |         |         |         |         |         |          |        |           | 60  |
| 181                                                 | GCTGT                                                        | GACAGAA | GTAGAC  | CTGTCT  | GATAA   | TTCATC  | CACACGT | TATAAC   | GAA    | TGAATC    | 240 |
| 181                                                 | GCTGT                                                        | GACAGAA | GTAGAC  | CTGTCT  | GATAA   | TTCATC  | CACACGT | TATAAC   | GAA    | TGAATC    | 240 |
| 61                                                  | -A--V--T--E--V--D--L--S--D--N--F--I--T--R--I--T--N--E--S--F- |         |         |         |         |         |         |          |        |           | 80  |
| 241                                                 | CAAGGG                                                       | CTGCAAA | ATCTG   | ACTAAA  | ATCAAC  | CTGAAC  | CATAA   | TGCCA    | AGTCCC | CAGAGT    | 300 |
| 241                                                 | CAAGGG                                                       | CTGCAAA | ATCTG   | ACTAAA  | ATCAAC  | CTGAAC  | CATAA   | TGCCA    | AGTCCC | CAGAGT    | 300 |
| 81                                                  | -Q--G--L--Q--N--L--T--K--I--N--L--N--H--N--A--K--S--Q--S--G- |         |         |         |         |         |         |          |        |           | 100 |
| 301                                                 | AATCCT                                                       | GCTGTAA | AGAAAG  | CTATG   | ACTATT  | ACAGAC  | GGGGC   | ATTTCT   | CAACCT | CAAACAC   | 360 |
| 301                                                 | AATCCT                                                       | GCTGTAA | AGAAAG  | CTATG   | ACTATT  | ACAGAC  | GGGGC   | ATTTCT   | CAACCT | CAAACAC   | 360 |
| 101                                                 | -N--P--A--V--K--K--A--M--T--I--T--D--G--A--F--L--N--L--K--H- |         |         |         |         |         |         |          |        |           | 120 |
| 361                                                 | CTAAGG                                                       | GAGTTG  | CTGCTG  | TGAAG   | GACAAC  | CAGTTA  | CAAGAA  | ATACCG   | GCTGGT | TTGCCAGAA | 420 |
| 361                                                 | CTAAGG                                                       | GAGTTG  | CTGCTG  | TGAAG   | GACAAC  | CAGTTA  | CAAGAA  | ATACCG   | GCTGGT | TTGCCAGAA | 420 |
| 121                                                 | -L--R--E--L--L--L--E--D--N--Q--L--Q--E--I--P--A--G--L--P--E- |         |         |         |         |         |         |          |        |           | 140 |
| 421                                                 | TCTTT                                                        | GAAAGAA | CTTAGT  | CTAATT  | CAAAACA | ATATA   | ATTACG  | TTAACG   | AAAAA  | GAACACT   | 480 |
| 421                                                 | TCTTT                                                        | GAAAGAA | CTTAGT  | CTAATT  | CAAAACA | ATATA   | ATTACG  | TTAACG   | AAAAA  | GAACACT   | 480 |
| 141                                                 | -S--L--K--E--L--S--L--I--Q--N--N--I--I--T--L--T--K--K--N--T- |         |         |         |         |         |         |          |        |           | 160 |
| <b>LWLT0100021.1_5066071_A/G synonymous variant</b> |                                                              |         |         |         |         |         |         |          |        |           |     |
| 481                                                 | TCTGG                                                        | ACTTGGG | AACCTG  | GAACGT  | CTCTAT  | TTGGG   | CTGGA   | ACTGT    | TATTTT | GCTTGT    | 540 |
| 481                                                 | TCTGG                                                        | ACTTGGG | AACCTG  | GAACGT  | CTCTAT  | TTGGG   | CTGGA   | ACTGT    | TATTTT | GCTTGT    | 540 |
| 161                                                 | -S--G--L--G--N--L--E--R--L--Y--L--G--W--N--C--Y--F--A--C--S- |         |         |         |         |         |         |          |        |           | 180 |
| 541                                                 | AAAAA                                                        | ATTTAG  | CATAGAA | ATGG    | AGCATT  | CCAAA   | ACCTT   | ACCAAG   | TGAAGG | TGCTGT    | 600 |
| 541                                                 | AAAAA                                                        | ATTTAG  | CATAGAA | ATGG    | AGCATT  | CCAAA   | ACCTT   | ACCAAG   | TGAAGG | TGCTGT    | 600 |
| 181                                                 | -K--K--F--S--I--E--N--G--A--F--Q--N--L--T--K--L--K--V--L--S- |         |         |         |         |         |         |          |        |           | 200 |
| 601                                                 | TTATC                                                        | TCTTTA  | AATCCC  | CTT     | CACAGC  | GTGCC   | ACCGAG  | TCTG     | CCAAGC | TCGCTA    | 660 |

|      |                                                                 |      |
|------|-----------------------------------------------------------------|------|
| 601  | TTATCTTTTAATCCCCTTCACAGCGTGCCACCGAGTCTGCCAAGCTCGCTAACAGAACTC    | 660  |
| 201  | -L--S--F--N--P--L--H--S--V--P--P--S--L--P--S--S--L--T--E--L-    | 220  |
| 661  | TACCTTAGCAATACCCATATTGGAAACGTCAGTGAAGAAGACTTCAAGGAACTGAGCAAT    | 720  |
| 661  | TACCTTAGCAATACCCATATTGGAAACGTCAGTGAAGAAGACTTCAAGGAACTGAGCAAT    | 720  |
| 221  | -Y--L--S--N--T--H--I--G--N--V--S--E--E--D--F--K--E--L--S--N-    | 240  |
| 721  | TTAAGAGTACTAGATTTAAGTGGAAAC TGCCCGAGATGTTTAAACGCTCCGTTTCCCTGT   | 780  |
| 721  | TTAAGAGTACTAGATTTAAGTGGAAACTGCCCGAGATGTTTAAACGCTCCGTTTCCCTGT    | 780  |
| 241  | -L--R--V--L--D--L--S--G--N--C--P--R--C--F--N--A--P--F--P--C-    | 260  |
| 781  | GTACCTTGCCAAAGGAGGTGCTTCAATT CAGATACACCCTCTTGCTTTTCAAAC TCTGACC | 840  |
| 781  | GTACCTTGCCAAAGGAGGTGCTTCAATT CAGATACACCCTCTTGCTTTTCAAAC TCTGACC | 840  |
| 261  | -V--P--C--Q--G--G--A--S--I--Q--I--H--P--L--A--F--Q--T--L--T-    | 280  |
| 841  | CAACTTCGCTACCTAAACCTCTCTAGCACTTCGCTCCGGAAGGTTCTGCCAGCTGGTTT     | 900  |
| 841  | CAACTTCGCTACCTAAACCTCTCTAGCACTTCGCTCCGGAAGGTTCTGCCAGCTGGTTT     | 900  |
| 281  | -Q--L--R--Y--L--N--L--S--S--T--S--L--R--K--V--P--A--S--W--F-    | 300  |
| 901  | GACAACATGCACAATCTGAAGGTGTTGGATCTTGAATTC AACTATTTAATGGACGAAATA   | 960  |
| 901  | GACAACATGCACAATCTGAAGGTGTTGGATCTTGAATTC AACTATTTAATGGACGAAATA   | 960  |
| 301  | -D--N--M--H--N--L--K--V--L--D--L--E--F--N--Y--L--M--D--E--I-    | 320  |
| 961  | GCCTCGGGGGAATTTT TGACAAAATTGCCCTCCTTAGAAATACTTGATTTATCTTACAAC   | 1020 |
| 961  | GCCTCGGGGGGAATTTT TGACAAAATTGCCCTCCTTAGAAATACTTGATTTATCTTACAAC  | 1020 |
| 321  | -A--S--G--E--F--L--T--K--L--P--S--L--E--I--L--D--L--S--Y--N-    | 340  |
| 1021 | TACGAACTGAAAAAATATCCTCAGCACATT AACATTTCCAAAAATTTCTCAAAGCTTATA   | 1080 |
| 1021 | TACGAACTGAAAAAATATCCTCAGCACATT AACATTTCCAAAAATTTCTCAAAGCTTATA   | 1080 |
| 341  | -Y--E--L--K--K--Y--P--Q--H--I--N--I--S--K--N--F--S--K--L--I-    | 360  |
| 1081 | TCTCTCCAGATGTTGCATTTAAGAGGT TATGTGTTCCAGGAAC TTAGAAGGAAAGATTTTC | 1140 |
| 1081 | TCTCTCCAGATGTTGCATTTAAGAGGT TATGTGTTCCAGGAAC TTAGAAGGAAAGATTTTC | 1140 |
| 361  | -S--L--Q--M--L--H--L--R--G--Y--V--F--Q--E--L--R--R--K--D--F-    | 380  |
| 1141 | AAGCCCCTGCAGCACCTCTCAAATTTAACGACTATCAACTTGGGTGTTAACTTTTATTAAG   | 1200 |
| 1141 | AAGCCCCTGCAGCACCTCTCAAATTTAACGACTATCAACTTGGGTGTTAACTTTTATTAAG   | 1200 |
| 381  | -K--P--L--Q--H--L--S--N--L--T--T--I--N--L--G--V--N--F--I--K-    | 400  |
| 1201 | CAGATTGATTTTAGCATTTTCCACTGGTTC CCAACCTGAAAATCGTTTACTTGTGAGAA    | 1260 |
| 1201 | CAGATTGATTTTAGCATTTTCCACTGGTTC CCAACCTGAAAATCGTTTACTTGTGAGAA    | 1260 |
| 401  | -Q--I--D--F--S--I--F--H--W--F--P--N--L--K--I--V--Y--L--S--E-    | 420  |
| 1261 | AACAGAATATCGCCCTTGGTCAGTGATACTGAGCAACATGATGCAAATAGGACCTTTTTC    | 1320 |
| 1261 | AACAGAATATCGCCCTTGGTCAGTGATACTGAGCAACATGATGCAAATAGGACCTTTTTC    | 1320 |
| 421  | -N--R--I--S--P--L--V--S--D--T--E--Q--H--D--A--N--R--T--F--F-    | 440  |
| 1321 | CAGAGTCACATCCTGAAGCGACGCTCAGCTGATATTCAATTTGACCCACATTCGAATTTT    | 1380 |
| 1321 | CAGAGTCACATCCTGAAGCGACGCTCAGCTGATATTCAATTTGACCCACATTCGAATTTT    | 1380 |
| 441  | -Q--S--H--I--L--K--R--R--S--A--D--I--Q--F--D--P--H--S--N--F-    | 460  |

|                                                      |                                                               |      |
|------------------------------------------------------|---------------------------------------------------------------|------|
| 1381                                                 | TATCATAACACCCATCCTTTAATAAAGACAGAATGTTACAGTCTTGGCAATGCC        | 1440 |
| 1381                                                 | TATCATAACACCCATCCTTTAATAAAGACAGAATGTTACAGTCTTGGCAATGCC        | 1440 |
| 461                                                  | -Y--H--N--T--H--P--L--I--K--T--E--C--S--R--L--G--N--A--L--D-  | 480  |
|                                                      |                                                               |      |
| 1441                                                 | TTAAGCTTGAACAGTATTTTCTTTATTGGGGTAAACCAGTTTAAAGATTTTGGAAACATT  | 1500 |
| 1441                                                 | TTAAGCTTGAACAGTATTTTCTTTATTGGGGTAAACCAGTTTAAAGATTTTGGAAACATT  | 1500 |
| 481                                                  | -L--S--L--N--S--I--F--F--I--G--V--N--Q--F--K--D--F--G--N--I-  | 500  |
|                                                      |                                                               |      |
| 1501                                                 | TCCTGTTTAAATCTGTCTTCAAATGGCAATGGCCAGGTGTTAAATGGAACGGAATTTTCA  | 1560 |
| 1501                                                 | TCCTGTTTAAATCTGTCTTCAAATGGCAATGGCCAGGTGTTAAATGGAACGGAATTTTCA  | 1560 |
| 501                                                  | -S--C--L--N--L--S--S--N--G--N--G--Q--V--L--N--G--T--E--F--S-  | 520  |
|                                                      |                                                               |      |
| 1561                                                 | CGCTTGCTCTGGTATCAAGTATTTGGATTGACAAACAATAGACTAGACTTTGATGATGAT  | 1620 |
| 1561                                                 | CGCTTGCTCTGGTATCAAGTATTTGGATTGACAAACAATAGACTAGACTTTGATGATGAT  | 1620 |
| 521                                                  | -R--L--S--G--I--K--Y--L--D--L--T--N--N--R--L--D--F--D--D--D-  | 540  |
|                                                      |                                                               |      |
| 1621                                                 | GCTGCTTTCAGTGAGTTGCCATTGTTGGAAGTTCTCGATCTCAGCTACAATGCGCACTAT  | 1680 |
| 1621                                                 | GCTGCTTTCAGTGAGTTGCCATTGTTGGAAGTTCTCGATCTCAGCTACAATGCGCACTAT  | 1680 |
| 541                                                  | -A--A--F--S--E--L--P--L--L--E--V--L--D--L--S--Y--N--A--H--Y-  | 560  |
|                                                      |                                                               |      |
| 1681                                                 | TTCCGAATAGCAGGGGTAACGCACCGTCTAGGATTTATTGAGCATTTAACTAACCTGAGA  | 1740 |
| 1681                                                 | TTCCGAATAGCAGGGGTAACGCACCGTCTAGGATTTATTGAGCATTTAACTAACCTGAGA  | 1740 |
| 561                                                  | -F--R--I--A--G--V--T--H--R--L--G--F--I--E--H--L--T--N--L--R-  | 580  |
|                                                      |                                                               |      |
| 1741                                                 | GTTTAAACTTGAGCAACAATGACATTTTACTTTAACAGAAACACAACCTGAAAAGCGCG   | 1800 |
| 1741                                                 | GTTTAAACTTGAGCAACAATGACATTTTACTTTAACAGAAACACAACCTGAAAAGCGCG   | 1800 |
| 581                                                  | -V--L--N--L--S--N--N--D--I--F--T--L--T--E--T--Q--L--K--S--A-  | 600  |
|                                                      |                                                               |      |
| 1801                                                 | TCCCTAGGAGAATTAGTTTTCAGTGGGAACCGCCTTGACCTTCTGTGGAATGCTCAAGAT  | 1860 |
| 1801                                                 | TCCCTAGGAGAATTAGTTTTCAGTGGGAACCGCCTTGACCTTCTGTGGAATGCTCAAGAT  | 1860 |
| 601                                                  | -S--L--G--E--L--V--F--S--G--N--R--L--D--L--L--W--N--A--Q--D-  | 620  |
|                                                      |                                                               |      |
| <b>LWLT0100021.1_50664682_A/G synonymous variant</b> |                                                               |      |
|                                                      |                                                               |      |
| 1861                                                 | GTCAGGTACTGGCAAATTTTCAAAATCTCACCAATCTGACCCGGCTTGACTTAGCCCGT   | 1920 |
| 1861                                                 | GTCAGGTACTGGCAAATTTTCAAAATCTCACCAATCTGACCCGGCTTGACTTAGCCCGT   | 1920 |
| 621                                                  | -V--R--Y--W--Q--I--F--Q--N--L--T--N--L--T--R--L--D--L--A--R-  | 640  |
|                                                      |                                                               |      |
| 1921                                                 | AATAACCTTCAGCATATCTCCAGTCAGACCTTCCTTAACCTTGCCCAGGACTCTCACTGAC | 1980 |
| 1921                                                 | AATAACCTTCAGCATATCTCCAGTCAGACCTTCCTTAACCTTGCCCAGGACTCTCACTGAC | 1980 |
| 641                                                  | -N--N--L--Q--H--I--S--S--Q--T--F--L--N--L--P--R--T--L--T--D-  | 660  |
|                                                      |                                                               |      |
| 1981                                                 | CTATATATAAATGATAACATGTTAAATTTCTTTAACTGGTCATTACTGGAATACTTCCTT  | 2040 |
| 1981                                                 | CTATATATAAATGATAACATGTTAAATTTCTTTAACTGGTCATTACTGGAATACTTCCTT  | 2040 |
| 661                                                  | -L--Y--I--N--D--N--M--L--N--F--F--N--W--S--L--L--E--Y--F--P-  | 680  |
|                                                      |                                                               |      |
| 2041                                                 | CACCTCAGGTTGCTTGACTTAAGTGGAACCAGCTGTTCTTTTAAACCAATAGCCTATCT   | 2100 |
| 2041                                                 | CACCTCAGGTTGCTTGACTTAAGTGGAACCAGCTGTTCTTTTAAACCAATAGCCTATCT   | 2100 |
| 681                                                  | -H--L--R--L--L--D--L--S--G--N--Q--L--F--F--L--T--N--S--L--S-  | 700  |

|      |                                                              |      |
|------|--------------------------------------------------------------|------|
| 2101 | ACATTTGCATCTTCTCTTGAGACGCTACTACTGAGTCGAAACAGAATTTCCACCTGCCA  | 2160 |
| 2101 | ACATTTGCATCTTCTCTTGAGACGCTACTACTGAGTCGAAACAGAATTTCCACCTGCCA  | 2160 |
| 701  | -T--F--A--S--S--L--E--T--L--L--L--S--R--N--R--I--S--H--L--P- | 720  |

|      |                                                              |      |
|------|--------------------------------------------------------------|------|
| 2161 | TCTGACTTTCTTCTGGAGCCAGCAGCCTGATACACCTCGATTGAGCTCCAACCAGCTC   | 2220 |
| 2161 | TCTGACTTTCTTCTGGAGCCAGCAGCCTGATACACCTCGATTGAGCTCCAACCAGCTC   | 2220 |
| 721  | -S--D--F--L--S--G--A--S--S--L--I--H--L--D--L--S--S--N--Q--L- | 740  |

|      |                                                              |      |
|------|--------------------------------------------------------------|------|
| 2221 | AAGATGCTCAACAGATCCACGTTTGAACGAAGACCGCCACCAAGTTAACCATTTTGGAA  | 2280 |
| 2221 | AAGATGCTCAACAGATCCACGTTTGAACGAAGACCGCCACCAAGTTAACCATTTTGGAA  | 2280 |
| 741  | -K--M--L--N--R--S--T--F--E--T--K--T--A--T--K--L--T--I--L--E- | 760  |

**LWLT01000021.1\_50664208\_C/T synonymous variant**

|      |                                                              |      |
|------|--------------------------------------------------------------|------|
| 2281 | CTAGGGAGTAACCTTTTGACTGTACCTGTGACTTCGGAGATTTTCGAGAATGGATGGAC  | 2340 |
| 2281 | CTAGGGAGTAACCTTTTGACTGTACCTGTGACTTCGGAGATTTTCGAGAATGGATGGAC  | 2340 |
| 761  | -L--G--S--N--P--F--D--C--T--C--D--F--G--D--F--R--E--W--M--D- | 780  |

|      |                                                              |      |
|------|--------------------------------------------------------------|------|
| 2341 | GGAAATCTGAACGTCAGGGTTCCAGACTGACCGATGTCATTTGTGCTAGTCCTGGGGAT  | 2400 |
| 2341 | GGAAATCTGAACGTCAGGGTTCCAGACTGACCGATGTCATTTGTGCTAGTCCTGGGGAT  | 2400 |
| 781  | -G--N--L--N--V--R--V--P--R--L--T--D--V--I--C--A--S--P--G--D- | 800  |

|      |                                                              |      |
|------|--------------------------------------------------------------|------|
| 2401 | CAAGAAGGCAAGAGCATTGTGAGTCTAGACCTCACCATTGTGTTTCAGATACCATTGCG  | 2460 |
| 2401 | CAAGAAGGCAAGAGCATTGTGAGTCTAGACCTCACCATTGTGTTTCAGATACCATTGCG  | 2460 |
| 801  | -Q--E--G--K--S--I--V--S--L--D--L--T--T--C--V--S--D--T--I--A- | 820  |

**LWLT01000021.1\_50664064\_C/T synonymous variant**

|      |                                                              |      |
|------|--------------------------------------------------------------|------|
| 2461 | GCCATATTCTGTTTCTTAACCTTTTCTGTACCATCTCAGTGATGCTGGCTGCCCTGGCC  | 2520 |
| 2461 | GCCATATTCTGTTTCTTAACCTTTTCTGTACCATCTCAGTGATGCTGGCTGCCCTGGCC  | 2520 |
| 821  | -A--I--F--C--F--L--T--F--S--V--T--I--S--V--M--L--A--A--L--A- | 840  |

|      |                                                              |      |
|------|--------------------------------------------------------------|------|
| 2521 | CACCACTGGTTTACTGGGATGCTTGGTTTATCTACCATGTGTGCTTAGCTAAGGTCAAA  | 2580 |
| 2521 | CACCACTGGTTTACTGGGATGCTTGGTTTATCTACCATGTGTGCTTAGCTAAGGTCAAA  | 2580 |
| 841  | -H--H--W--F--Y--W--D--A--W--F--I--Y--H--V--C--L--A--K--V--K- | 860  |

|      |                                                              |      |
|------|--------------------------------------------------------------|------|
| 2581 | GGCTACAGGTCTCTGTCCACATCCCAGACTTTCTACGATGCTTATGTTTCTTATGACACC | 2640 |
| 2581 | GGCTACAGGTCTCTGTCCACATCCCAGACTTTCTACGATGCTTATGTTTCTTATGACACC | 2640 |
| 861  | -G--Y--R--S--L--S--T--S--Q--T--F--Y--D--A--Y--V--S--Y--D--T- | 880  |

|      |                                                              |      |
|------|--------------------------------------------------------------|------|
| 2641 | AAAGACGCTTCTGTACGGACTGGGTGATCAATGAATTGCGCTTCACCTGGAAGAGAGT   | 2700 |
| 2641 | AAAGACGCTTCTGTACGGACTGGGTGATCAATGAATTGCGCTTCACCTGGAAGAGAGT   | 2700 |
| 881  | -K--D--A--S--V--T--D--W--V--I--N--E--L--R--F--H--L--E--E--S- | 900  |

|      |                                                              |      |
|------|--------------------------------------------------------------|------|
| 2701 | GAGGACAAGAACGTGCTCCTGTGTTTAGAGGAAAGGGATTGGGACCCGGGTCTAGCCATC | 2760 |
| 2701 | GAGGACAAGAACGTGCTCCTGTGTTTAGAGGAAAGGGATTGGGACCCGGGTCTAGCCATC | 2760 |
| 901  | -E--D--K--N--V--L--L--C--L--E--E--R--D--W--D--P--G--L--A--I- | 920  |

|      |                                                             |      |
|------|-------------------------------------------------------------|------|
| 2761 | ATCGACAACCTCATGCAGAGCATCAACCAAAGCAAGAAAACAATATTTGTTTAAACCAA | 2820 |
|------|-------------------------------------------------------------|------|

|      |                                                               |      |
|------|---------------------------------------------------------------|------|
| 2761 | ATCGACAACCTCATGCAGAGCATCAACCAAAGCAAGAAAACAATATTTGTTTTAACCAAA  | 2820 |
| 921  | -I--D--N--L--M--Q--S--I--N--Q--S--K--K--T--I--F--V--L--T--K-- | 940  |
| 2821 | AAATATGCCAAAACTGGAATTTTAAACGGCATTCTACTTGGCCTTGCAGAGGCTAATG    | 2880 |
| 2821 | AAATATGCCAAAACTGGAATTTTAAACGGCATTCTACTTGGCCTTGCAGAGGCTAATG    | 2880 |
| 941  | -K--Y--A--K--N--W--N--F--K--T--A--F--Y--L--A--L--Q--R--L--M-- | 960  |
| 2881 | GAGGAGAATATGGATGTGATTGTCTTTATTCTGCTGGAGCCAGTGTTCAGCATTCGCAG   | 2940 |
| 2881 | GAGGAGAATATGGATGTGATTGTCTTTATTCTGCTGGAGCCAGTGTTCAGCATTCGCAG   | 2940 |
| 961  | -E--E--N--M--D--V--I--V--F--I--L--L--E--P--V--L--Q--H--S--Q-- | 980  |
| 2941 | TATTTGAGGCTGCGGCAGAGGATCTGCAAGAGTTCCATCCTCCAGTGGCCTGATAACCCC  | 3000 |
| 2941 | TATTTGAGGCTGCGGCAGAGGATCTGCAAGAGTTCCATCCTCCAGTGGCCTGATAACCCC  | 3000 |
| 981  | -Y--L--R--L--R--Q--R--I--C--K--S--S--I--L--Q--W--P--D--N--P-- | 1000 |
| 3001 | AAGGCGGAAGGCTTGTTTTGGCAGAGTCTGAAAAATGTCGTCCTAACAGCCAACGATTCA  | 3060 |
| 3001 | AAGGCGGAAGGCTTGTTTTGGCAGAGTCTGAAAAATGTCGTCCTAACAGCCAACGATTCA  | 3060 |
| 1001 | -K--A--E--G--L--F--W--Q--S--L--K--N--V--V--L--T--A--N--D--S-- | 1020 |
| 3061 | CGGATCTTCTGTCCGTTGCAGTATGAATCTTGAAGACGAACCTTATGAAATTGACCTGAA  | 3120 |
| 3061 | CGGATCTTCTGTCCGTTGCAGTATGAATCTTGA.....                        | 3093 |
| 1021 | -R--I--F--C--P--L--Q--Y--E--S--*-.....                        | 1030 |
| 3121 | AATAACTGGAAATCATTAGAGCATAAGAAAATAAAATCCCTTTATCTCATCTATCTTCTT  | 3180 |
|      | .....                                                         |      |
|      | .....                                                         |      |
| 3181 | CAATTCACAATTTCTACTTAATGGACAGATGCTTTTTGAACAACCAATATGTATTGAGTC  | 3240 |
|      | .....                                                         |      |
|      | .....                                                         |      |
| 3241 | CTAAGGTGGGTTCTGAAATGCCCAATATCTATCAGCTGTTGAGTGGATAAAATAAAATGGG | 3300 |
|      | .....                                                         |      |
|      | .....                                                         |      |
| 3301 | CTATCACCATACACTGGAGTATTATTCAGCCTTAGAAAGGGATGGAGTATGACACACAGG  | 3360 |
|      | .....                                                         |      |
|      | .....                                                         |      |
| 3361 | ACAACATGGATGTGCCTTGGAACCAGATGCTCAGTGAAAGACGCCAGTCACAAGAAACC   | 3420 |
|      | .....                                                         |      |
|      | .....                                                         |      |
| 3421 | ACATGTTGTCTGATGCCATATATAGGAAATGTCCAGAATAGGCAAATCCATAGAAACAGA  | 3480 |
|      | .....                                                         |      |
|      | .....                                                         |      |
| 3481 | AAC TGGGGAAGTGGTTCCCCGGGGCTGGGGGAGCCAAGAGAAGATGGGAAGTGACTGCA  | 3540 |
|      | .....                                                         |      |
|      | .....                                                         |      |

|      |                                                               |      |
|------|---------------------------------------------------------------|------|
| 3541 | TATGGTCACAGGATGTCTTGTTGGAGTGAGGCCACATTCTCAAATTCATGATAGTGATGG  | 3600 |
|      | .....                                                         |      |
|      | .....                                                         |      |
| 3601 | CTGCATAACTTTGTGAATCTCCTGACAGCCTTATTTCTTCTTGCCATTTTTTCAGTG     | 3660 |
|      | .....                                                         |      |
|      | .....                                                         |      |
| 3661 | GCTTTTCCAGCATGGCCTCACCATGTCTGAAGCTCCAGCATTTCTGTTCTACTCCTGAAG  | 3720 |
|      | .....                                                         |      |
|      | .....                                                         |      |
| 3721 | TTGTCTCTATCAGCTCAGTTTGTCTTCCTCTTTTGC GG GGAAGCTGGTCAAGATTCGC  | 3780 |
|      | .....                                                         |      |
|      | .....                                                         |      |
| 3781 | CAAATCCCTGTTTGGCACTGATCTCTGGTGGTTGGCCTCTGTAAAGAACCCTGAACCACA  | 3840 |
|      | .....                                                         |      |
|      | .....                                                         |      |
| 3841 | GGAATTAGAATGCCCAGGTCTGATCATAGCAAATCACTCTGCGTTTCTTTTTTTCCTTT   | 3900 |
|      | .....                                                         |      |
|      | .....                                                         |      |
| 3901 | TTCAAAAAATTTATTTGATTGTACTGGTCTTAGTTGTGACATGTGGGATCTAGTTCCTG   | 3960 |
|      | .....                                                         |      |
|      | .....                                                         |      |
| 3961 | ACTCCCTGGTCAAACCCGGGCCCCCTGCATTGGGAGCACCGAGTCTTAACCACTGGACCC  | 4020 |
|      | .....                                                         |      |
|      | .....                                                         |      |
| 4021 | CCAGGGAAGTTCCCACTCCACCTTTCTGAGCATGATTCTCATGTCTAGAATGAACTATG   | 4080 |
|      | .....                                                         |      |
|      | .....                                                         |      |
| 4081 | TGATCTCTATGTGATTTTCCAACATTACAACCTGCATTGCGTTTCCTAGCATCACAAAACA | 4140 |
|      | .....                                                         |      |
|      | .....                                                         |      |
| 4141 | AAGTGCCCCAACTGGGTGGCTTAAACAATCAAAGTTCATTGTCTCACAGTTCTGAGGG    | 4200 |
|      | .....                                                         |      |
|      | .....                                                         |      |
| 4201 | CTACAAGTCTGAAATCTGAGTGTCTACGGGGCCATGGTTCCTCTGAAACTTGTAGCCGAG  | 4260 |
|      | .....                                                         |      |
|      | .....                                                         |      |

|      |                                                               |      |
|------|---------------------------------------------------------------|------|
| 4261 | GGTCCTTCCTTGCCCTTTCCCAGCTCCTGATGTTGCTGGGAGTCCTCGGAGTCCCTTGGCC | 4320 |
|      | .....                                                         |      |
|      | .....                                                         |      |
| 4321 | TGTCGCTGCGTCACTCTGGTCTCTGCCTCCGCTGTTGCATGGCCACCTTCCCTCCCTGTC  | 4380 |
|      | .....                                                         |      |
|      | .....                                                         |      |
|      | LWLT01000021.1_50659559_C/T 3'UTR variant                     |      |
| 4381 | TCTCTGCTCTTATAAGGATGTTAGTCCTGTTGGAGTCAGGGTCCACCCTCCTCCAACATG  | 4440 |
|      | .....                                                         |      |
|      | .....                                                         |      |
| 4441 | GCTGTGTTTTAACCAATAACATCTGCAGCAGCTCTGTTTCCAAATGAGGTCATAGTCTTC  | 4500 |
|      | .....                                                         |      |
|      | .....                                                         |      |
| 4501 | TTTTTTTGAAGGAAGTAGTGTCTTTATTTCTTTTAATATTTATTTTCTTATTTATTTGAC  | 4560 |
|      | .....                                                         |      |
|      | .....                                                         |      |
| 4561 | TGCGCTCTTAGTTGCGGCATGTGGGATCTAGTTCTCTGACCAAGGATCAAACCCAGCCC   | 4620 |
|      | .....                                                         |      |
|      | .....                                                         |      |
|      | LWLT01000021.1_50659346_C/A 3'UTR variant                     |      |
| 4621 | CCTGCCTTGGGAACGTGGGGTCTTAACCCCTGGACCACCAGGGAAGTCCCTCCAAATGAG  | 4680 |
|      | .....                                                         |      |
|      | .....                                                         |      |
| 4681 | GTCATACTCTGAGGTACTGGAAGTTACAACCTCAACATAAAATTTGGGAAGGACACAGTT  | 4740 |
|      | .....                                                         |      |
|      | .....                                                         |      |
|      | LWLT01000021.1_50659202_T/C 3'UTR variant                     |      |
| 4741 | CAACTCCTAACACAACACTGTGGCTTTGCTTCTTTAGAAATTACTCAGAACTCCGTGAAAG | 4800 |
|      | .....                                                         |      |
|      | .....                                                         |      |
|      | LWLT01000021.1_50659136_A/C 3'UTR variant                     |      |
| 4801 | TTGAAAATGCCCTTGTGAAAGGGGAAAGTCATTTGAGTATTGGAAGAATAAAGGCAATTCC | 4860 |
|      | .....                                                         |      |
|      | .....                                                         |      |
| 4861 | CCTCTCAGCTATTAATAAAGCTATAATAGTGATATGGCCAGGTTTCACCCTCATTATCCT  | 4920 |
|      | .....                                                         |      |
|      | .....                                                         |      |
| 4921 | TGAACCTAAAGCCATAATGGTATCTATTATTTCCCATGAGCACAAAAGAAGGTCGTGCAG  | 4980 |
|      | .....                                                         |      |
|      | .....                                                         |      |

|      |                                                              |      |
|------|--------------------------------------------------------------|------|
| 4981 | TCGTGTTCTCTTTCTGCCCTTGAATGGGAGAATTGGTCAATCCATGTCTCACTCAGCAAT | 5040 |
|      | .....                                                        |      |
|      | .....                                                        |      |
| 5041 | CACGGTGCAGTCTTGGAGGAACAAGGTGAGGGAAAAC TGGGTTTGAACCAGAAGGGGCC | 5100 |
|      | .....                                                        |      |
|      | .....                                                        |      |
| 5101 | ATCACGGGACATCCTCTGCCAATGACCCCAAAGAGAAAATAGTCTTTATAAATGTCCCTT | 5160 |
|      | .....                                                        |      |
|      | .....                                                        |      |
| 5161 | CAGTGTGTGAAGAGATGAGAGGTACAAAGAGAAAAACAAAACCCCACTTATGATAGCAG  | 5220 |
|      | .....                                                        |      |
|      | .....                                                        |      |
| 5221 | AATATTGCCATGGGGAAGCTCTTTGGTTTTTTTTGAGCCTTTTCATTTCTAGTGAGTTGC | 5280 |
|      | .....                                                        |      |
|      | .....                                                        |      |
| 5281 | ATTTCTAGGAGAGAAAAGAAGACCCCTTTGTTTTCCAGTCTTCCTCTCCTTTGACATTT  | 5340 |
|      | .....                                                        |      |
|      | .....                                                        |      |
| 5341 | TACCTGGCCTATTTTAAGTATAACTCTCTATCTCAGTAATGATGATACCAGAAACTCAGA | 5400 |
|      | .....                                                        |      |
|      | .....                                                        |      |
| 5401 | GCTGATCAAGAGTGATCGATGTCTGGATTGTAGAAAGCTCAGAGGCAGTTCCTCAAGCCA | 5460 |
|      | .....                                                        |      |
|      | .....                                                        |      |
| 5461 | GACACCTGAGGCTCACTGTTGACTACTGCATCTTACTCCCATACCCAACCATTCTAG    | 5520 |
|      | .....                                                        |      |
|      | .....                                                        |      |
| 5521 | CAGATTTCCGCCCCCTCCTTGGCTGTGCCATGTCTTAGGTATGGCACGTGGGATCTAGC  | 5580 |
|      | .....                                                        |      |
|      | .....                                                        |      |
| 5581 | CCTCTGAGCATGGATCGAACCAGGGCCCCTGCATTGGGAGCAAAGTCTTAACCACTGGA  | 5640 |
|      | .....                                                        |      |
|      | .....                                                        |      |
| 5641 | CCACCAGGGAAGTCCCCATCTAGCAGTCTTGACCTCTTAAATTTCTCTCCCATCCATCCT | 5700 |
|      | .....                                                        |      |
|      | .....                                                        |      |

|      |                                                                |      |
|------|----------------------------------------------------------------|------|
| 5701 | CCGTCTCTGTCTCTATCATCACCATGCCTTATCCAAGCTACGAGCATCTCTTATTGGCTT   | 5760 |
|      | .....                                                          |      |
|      | .....                                                          |      |
| 5761 | GCTGGTATCTACTCTGATCCCTTCCCCAGTTTCAGTTCCAGCAGCCAGTGATTTCGTGTAAA | 5820 |
|      | .....                                                          |      |
|      | .....                                                          |      |
| 5821 | AGATGCAACTACTGAATTAATTTAAAACTTAATCCTAAACAAGGCACACAGGACTCTC     | 5880 |
|      | .....                                                          |      |
|      | .....                                                          |      |
| 5881 | TGTAACCTCCCATTGGCCTGCCCTCAGGCCTCCTCTCTGTGCATCCCTGTCACTAGCTT    | 5940 |
|      | .....                                                          |      |
|      | .....                                                          |      |
| 5941 | TTGGTTCATGCTGAGAACACACCGAACCTCTTGCCTCAGTACCTCCACACAGGCTACTA    | 6000 |
|      | .....                                                          |      |
|      | .....                                                          |      |
| 6001 | CCCTGAGGCCCTCCTCCTCCAGGCTTCAATTTCTAACTCCTGCTCATCCTACAGAGAG     | 6060 |
|      | .....                                                          |      |
|      | .....                                                          |      |
| 6061 | AGGTTCACCTTAGAGAGGCTGTTCCCTAACCTCCAAATCTCACCTAGACTATCATCTTAGC  | 6120 |
|      | .....                                                          |      |
|      | .....                                                          |      |
| 6121 | ATTGATCACAAGTTTTATTGTGAAGACCACAGAGAAATGGATAAAGTGCTTTTAACGCAT   | 6180 |
|      | .....                                                          |      |
|      | .....                                                          |      |
| 6181 | GGGTCTTCCATTAGACTGTGGCCTCTAGAGATGAGAGAAGGTTCTTTTCGGTCCATCATT   | 6240 |
|      | .....                                                          |      |
|      | .....                                                          |      |
| 6241 | GTGTCCCC                                                       |      |

Genomic DNA (reverse strand) sequence with SNP and primers localization:

LWLT01000021.1\_50666071\_A/G synonymous variant

CCTGAACCATAATGCCAAGTCCCAGAGTGGAAATCCTGCTGTAAAGAAAGCTATGACTAT  
TACAGACGGGGCATTCTCAACCTCAAAACACCTAAGGGAGTTGCTGCTGGAAGACAACCA  
GTTACAAGAAATACCGGCTGGTTTGCCAGAATCTTTGAAAGAACTTAGTCTAATTCAAAA  
CAATATAATTACGTTAACGAAAAAGAACACTTCTGGACTTGGAACCTGGAACGTCTCTA  
TTTGGGCTGGAAGTGTATTTTGCTTGTAGTAAAAAATTTAGCATAGAAAATGGAGCATT  
CCAAAACCTTACCAAGTTGAAGGTGCTGTCATTATCTTTTAATCCCCTTCACAGCGTGCC  
ACCGAGTCTGCCAAGCTCGCTAACAGAACTCTACCTTAGCAATACCCATATTGGAAACGT  
CAGTGAAGAAGACTTCAAGGAAGTGAAGCAATTTAAGAGTACTAGATTTAAGTGGAACCTG

LWLT01000021.1\_50664682\_A/G synonymous variant

AGTTCTCGATCTCAGCTACAATGCGCACTATTTCCGAATAGCAGGGGTAACGCACCGTCT  
AGGATTTATTGAGCATTTAACCTAACCTGAGAGTTTAAACTTGAGCAACAATGACATTTT  
TACTTTAACAGAAACACAACCTGAAAAGCGCGTCCCTAGGAGAATTAGTTTTTCAGTGGGAA  
CCGCCTTGACCTTCTGTGGAATGCTCAAGATGTCAGGTACTGGCAAATTTTTCAAATCT  
CACCAATCTGACCCGGCTTGACTTAGCCCGTAATAACCTTCAGCATATCTCCAGTCAGAC  
CTTCCTTAACCTTGCCAGGACTCTCACTGACCTATATATAAATGATAACATGTTAAATTT  
CTTTAACTGGTCATTACTGGAATACTTCCCTCACCTCAGGTTGCTTGACTTAAGTGAAAA  
CCAGCTGTTCTTTTAAACCAATAGCCTATCTACATTTGCATCTTCTCTTGAGACGCTACT

<sup>1</sup>LWLT01000021.1\_50664283\_C/T synonymous variant

<sup>2</sup>LWLT01000021.1\_50664064\_C/T synonymous variant

CTTTAACTGGTCATTACTGGAATACTTCCCTCACCTCAGGTTGCTTGACTTAAGTGAAAA  
CCAGCTGTTCTTTTAAACCAATAGCCTATCTACATTTGCATCTTCTCTTGAGACGCTACT  
ACTGAGTCGAAACAGAATTTCCACCTGCCATCTGACTTTCTTTCTGGAGCCA<sup>1</sup>GCAGCCT  
GATACACCTCGATTGAGCTCCAACCAGCTCAAGATGCTCAACAGATCCACG<sup>1</sup>TTGAAAC  
GAAGACCGCCACCAAGTTAACCATTTTGGAACTAGGGAGTAACCCCTTTTGACTGTACCTG  
TGACTTCGGAGATTTTCGAGAATGGATGGACGGAAATCTGAACGTCAGGGTTCCAGACT  
GACCGATGTCATTTGTGCTAGTCCTGGGGATCAAGAAGGCAAGAGCATTGTGAGTCTAGA  
CCTCACCACTTGTGTTTCAGATACCATTGCG<sup>2</sup>GCCATATTCTGTTTCTTAACCTTTTCTGT  
CACCATCTCAGTGATGCTGGCTGCCCTGGCCCACTGAGTTTACTGGGATGCTTGGTT  
TATCTACCATGTGTGCTTAGCTAAGGTCAAAGGCTACAGGTCTCTGTCCACATCCCAGAC  
TTTCTACGATGCTTATGTTTCTTATGACACCAAAGACGCTTCTGTACGGACTGGGTGAT

<sup>1</sup>LWLT01000021.1\_50659559\_C/T 3'UTR variant

<sup>2</sup>LWLT01000021.1\_50659346\_C/A 3'UTR variant

<sup>3</sup>LWLT01000021.1\_50659202\_T/C 3'UTR variant

<sup>4</sup>LWLT01000021.1\_50659136\_A/C 3'UTR variant

GAGGGCTACAAGTCTGAAATCTGAGTGTCTACGGGGCCATGGTTCCTCTGAAACTTGTAG  
CCGAGGGTCCTTCCTTGCCCTTTCCAGCTCCTGATGTTGCTGGGAGTCCTCGGAGTCCCT  
TGGCCTGTCGCTGCGTCACTCTGGTCTCTGCCTCCG<sup>1</sup>CTGTTGCATGGCCACCTTCCCTCC  
CTGTCTCTCTGCTCTTATAAGGATGTTAGTCCTGTTGGAGTCAGGGTCCACCCCTCTCCA  
ACATGGCTGTGTTTAAACCAATAACATCTGCAGCAGCTCTGTTTCAAATGAGGTCATAG  
TCTTCTTTTTTTGAAGGAAGTAGTGTATTCTTTTAAATATTTATTTTCTTATTTAT  
TTGACTGCG<sup>2</sup>CTCTTAGTTGCGGCATGTGGGATCTAGTTCTCTGACCAAGGATCAAACCCC  
AGCCCCCTGCCTTGGGAACGTGGGGTCTTAACCCCTGGACCACCAGGGAAGTCCCTCCAA  
ATGAGGTCATACTCTGAGGTACTGGAAGTTACA<sup>3</sup>ACTTCAACATAAAATTTGGGAAGGACA  
CAGTTCAACTCCTAACAACAACCTGTGGCTTTGCTTCTT<sup>4</sup>AGAAATTACTCAGAACTCCGT  
GAAAGTTGAAAATGCCCTTGTGAAAGGAAAAGTCATTTGAGTATTGGAAGAATAAAGGCA  
ATTCCCCTCTCAGCTATTAATAAAGCTATAATAGTGATATGGCCAGGTTTCACCCCTCATT
