# Supplementary material for: Single Nucleotide Polymorphisms in Genes Encoding Toll-Like Receptors 7 and 8 and Their Association with Proviral Load of SRLVs in Goats of Polish Carpathian Breed
Source: Animals (Basel). 2021 Jun 26;11(7):1908. doi: 10.3390/ani11071908 (PMC8300119; doi:10.3390/ani11071908)
Supplement: Supplementary file 1 [file animals-11-01908-s001.zip › Supplementary Table S1-updated.pdf]

Supplementary Table S1. The linkage disequilibrium (LD) between identified SNPs in TLRs genes.

| SNP1                    | SNP2                    | r <sup>2</sup> |
|-------------------------|-------------------------|----------------|
| TLR7                    |                         |                |
| LWLT01000021.1-50701297 | LWLT01000021.1-50702074 | 0.854          |
| LWLT01000021.1-50701297 | LWLT01000021.1-50703293 | <b>0.173</b>   |
| LWLT01000021.1-50701297 | LWLT01000021.1-50718645 | 0.731          |
| LWLT01000021.1-50702074 | LWLT01000021.1-50703293 | <b>0.148</b>   |
| LWLT01000021.1-50702074 | LWLT01000021.1-50718645 | 0.856          |
| LWLT01000021.1-50703293 | LWLT01000021.1-50718645 | <b>0.127</b>   |
| TLR8                    |                         |                |
| LWLT01000021.1-50659136 | LWLT01000021.1-50659346 | <b>0.118</b>   |
| LWLT01000021.1-50659136 | LWLT01000021.1-50659559 | <b>0.018</b>   |
| LWLT01000021.1-50659136 | LWLT01000021.1-50664064 | <b>0.156</b>   |
| LWLT01000021.1-50659136 | LWLT01000021.1-50664208 | <b>0.156</b>   |
| LWLT01000021.1-50659136 | LWLT01000021.1-50664682 | <b>0.001</b>   |
| LWLT01000021.1-50659136 | LWLT01000021.1-50666071 | <b>0.156</b>   |
| LWLT01000021.1-50659346 | LWLT01000021.1-50659559 | 0.251          |
| LWLT01000021.1-50659346 | LWLT01000021.1-50664064 | 0.762          |
| LWLT01000021.1-50659346 | LWLT01000021.1-50664208 | 0.762          |
| LWLT01000021.1-50659346 | LWLT01000021.1-50664682 | <b>0.008</b>   |
| LWLT01000021.1-50659346 | LWLT01000021.1-50666071 | 0.762          |
| LWLT01000021.1-50659559 | LWLT01000021.1-50664064 | 0.33           |
| LWLT01000021.1-50659559 | LWLT01000021.1-50664208 | 0.33           |
| LWLT01000021.1-50659559 | LWLT01000021.1-50664682 | <b>0.022</b>   |
| LWLT01000021.1-50659559 | LWLT01000021.1-50666071 | 0.33           |
| LWLT01000021.1-50664064 | LWLT01000021.1-50664208 | 1.0            |
| LWLT01000021.1-50664064 | LWLT01000021.1-50664682 | <b>0.01</b>    |
| LWLT01000021.1-50664064 | LWLT01000021.1-50666071 | 1.0            |
| LWLT01000021.1-50664208 | LWLT01000021.1-50664682 | <b>0.01</b>    |
| LWLT01000021.1-50664208 | LWLT01000021.1-50666071 | 1.0            |
| LWLT01000021.1-50664682 | LWLT01000021.1-50666071 | <b>0.01</b>    |

r<sup>2</sup> value - the square of the correlation coefficient between two SNPs
